# Supplementary material for: Deep Sequencing Reveals Complex Spurious Transcription from Transiently Transfected Plasmids
Source: PubMed Central journal article supplement (PMC3420890; doi:10.1371/journal.pone.0043283), 2012-08-16

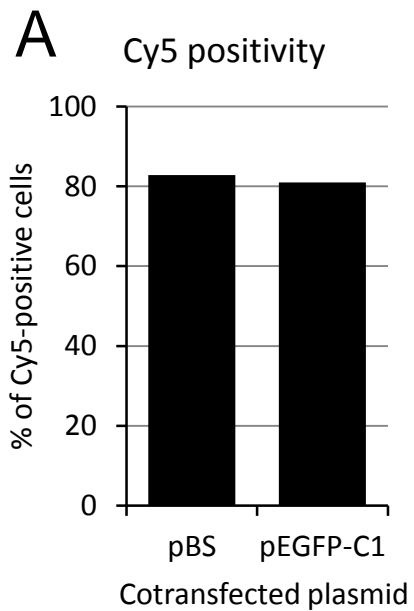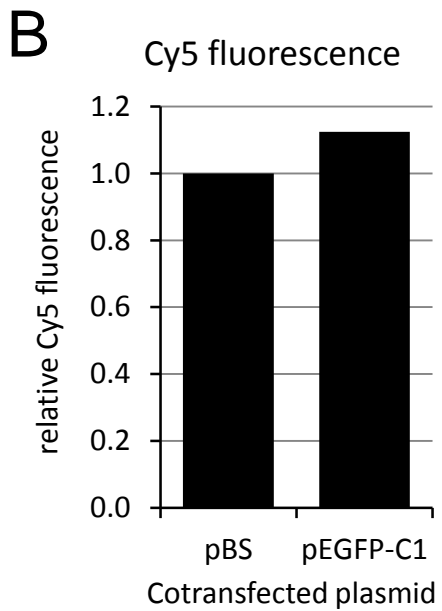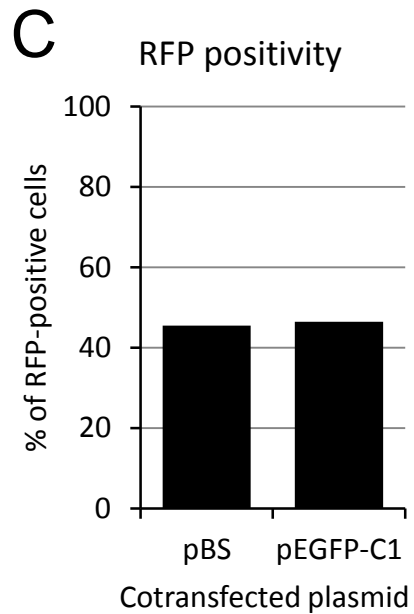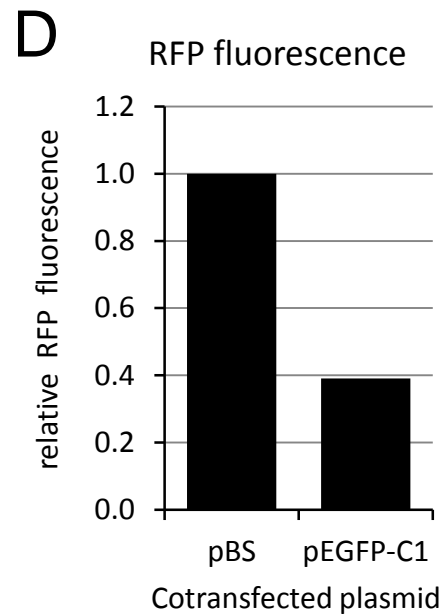

Supplement: pone.0043283.s001.pdf [file pone.0043283.s001.pdf]
