# Supplementary material for: Deep Sequencing Reveals Complex Spurious Transcription from Transiently Transfected Plasmids
Source: PubMed Central journal article supplement (PMC3420890; doi:10.1371/journal.pone.0043283), 2012-08-16

**A**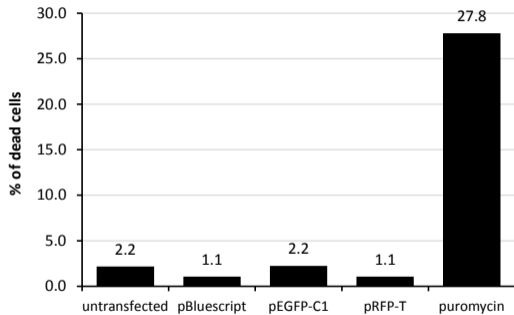**B**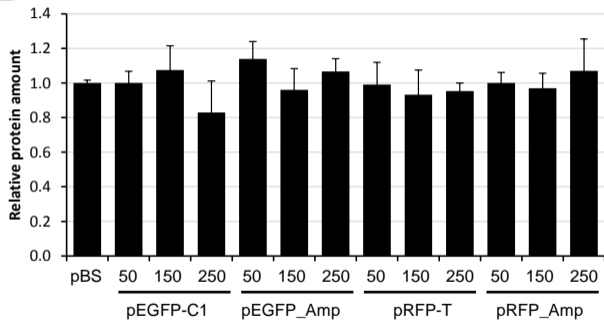

Supplement: pone.0043283.s002.pdf [file pone.0043283.s002.pdf]
